# Supplementary material
Source: Research Square preprint supplement (doi:10.21203/rs.3.rs-9455683/v1)
Supplement: Supplementary file 1 [file 357699ffeba75cc7df6ca8ed.docx]

# Appendix- Interview guide (translated from German original)

## Preamble provided to interviewees

Telemetry systems enable the storage and real-time transmission of various operational parameters and sensor data from agricultural machinery to an external server. These include position data, distance travelled, and speed, as well as machine-specific data such as fuel consumption and engine speed. Telemetry systems are used, among other applications, in fleet management. They enable remote access to machines, allowing both the monitoring of work processes and the transmission of new work orders. Further applications of telemetry in arable farming include irrigation control, soil monitoring, and crop condition assessment (Kehl et al., 2021).

## Part 1: Telemetry use

1. Have you heard of telemetry data before?

*Probe: If yes: When did you first hear about it?*

2. Do you use telemetry data?

*Probe: If yes: Since when have you been using telemetry data on your farm?*

3. Which telemetry data provider do you use for your farm?

4. For which machines do you use telemetry data?

5. How frequently do you use the data?

### Performance expectancy

6. To what extent does the analysis of telemetry data help you increase your yields?

7. To what extent have you been able to reduce your operating costs through the use of telemetry data?

8. To what extent has your farm become more efficient through telemetry data use?

9. In which areas have you experienced a reduction in workload through the use of telemetry data?

*Probe: Areas explored: administrative burden, work monitoring, fleet management, machine maintenance and servicing.*

*Probe: If applicable: How significant is this reduction? What does it look like in practice?*

10. What do you consider the greatest economic benefit of using telemetry data on your farm?

11. What do you see as the greatest weakness of using telemetry data on your farm?

*Probe: If response is brief: What further weaknesses do you see?*

12. What future changes do you expect from the use of telemetry data?

13. How does the use of telemetry data affect the sustainability of your farm?

### Effort expectancy

14. How easily were you able to integrate telemetry technology into your daily work routine?

15. How easy do you find it to use telemetry data?

16. Is the user interface of your telemetry data provider user-friendly?

17. What particular obstacles exist in the use of telemetry data?

18. How complex do you consider the use of telemetry data to be?

19. What technical tools do you need to use telemetry data?

### Social influence

20. What do you think your professional colleagues think about the fact that you use telemetry data?

21. Have professional colleagues helped you get started with telemetry data use?

22. What influence do you have on your professional colleagues through your use of telemetry data?

23. To what extent have you been influenced by agricultural advisors, associations, or colleagues in your decision to use telemetry data?

24. What do other people close to you think about your use of this technology?

### Facilitating conditions

25. What technical equipment did you have to acquire in order to use the technology?

26. Did you acquire new agricultural vehicles specifically to use telemetry data?

27. How do you assess the availability and reliability of the data connections required for telemetry data transmission?

### Additional Elements

28. How would you describe your skills in handling new technologies?

29. Would you describe yourself as someone who takes a higher risk when adopting new technologies?

30. Do you have any concerns or anxieties about using new technologies?

## Part 2: Sociodemographic and farm characteristics

### Personal information

31. In which year were you born?

32. What is your gender?

33. What is your highest agriculture-specific educational qualification?

### Farm characteristics

34. What is your position on the farm?

35. How many years have you been working in agriculture?

*Probe: For farm managers: How many years have you been farm manager?*

36. How many hectares of arable land do you manage?

37. How many hectares of that are owned land?

38. Where in Germany is your farm located?

41. Do you have additional branches of business besides arable farming?

42. Do you use other digital technologies from the precision farming domain (e.g., guidance systems, application maps, yield mapping)?
